# Supplementary material for: Synergistic Antioxidant and Anti-Inflammatory Effects of Phenolic Acid-Conjugated Glutamine–Histidine–Glycine–Valine (QHGV) Peptides Derived from Oysters (Crassostrea talienwhanensis)
Source: MDPI journal article supplement (doi:10.3390/antiox13040447), 2024-04-10

# Western Blots raw data

Figure 6(a)  
JNK  
3708S,Cell signaling

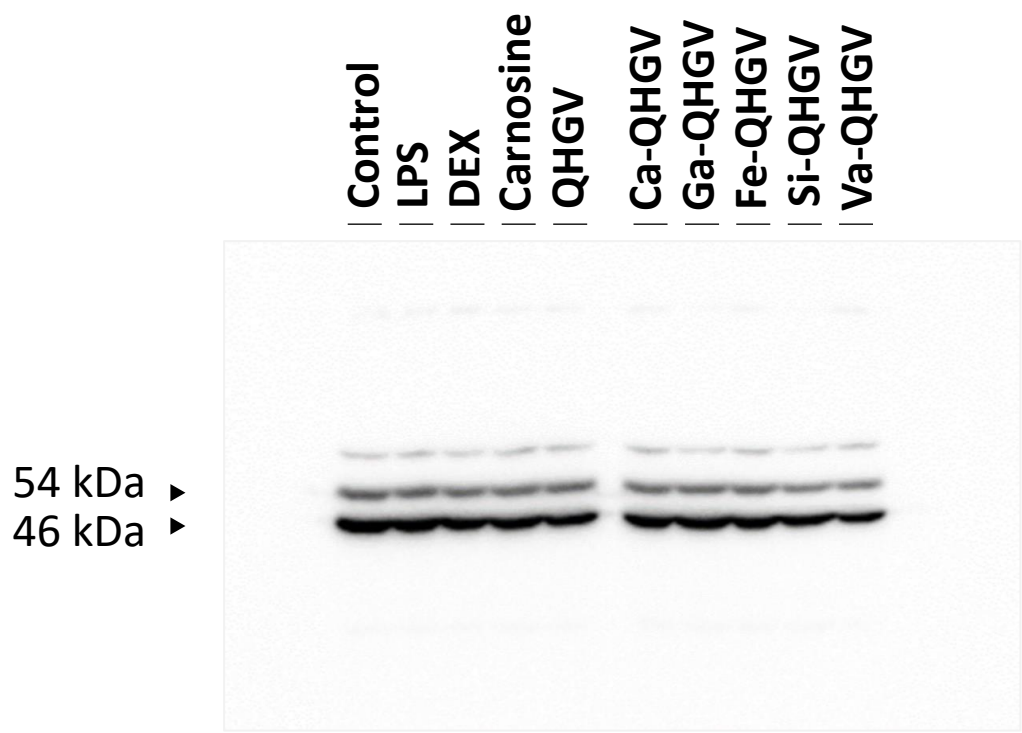

Figure 6(a)  
p-JNK  
9255S,Cell signaling

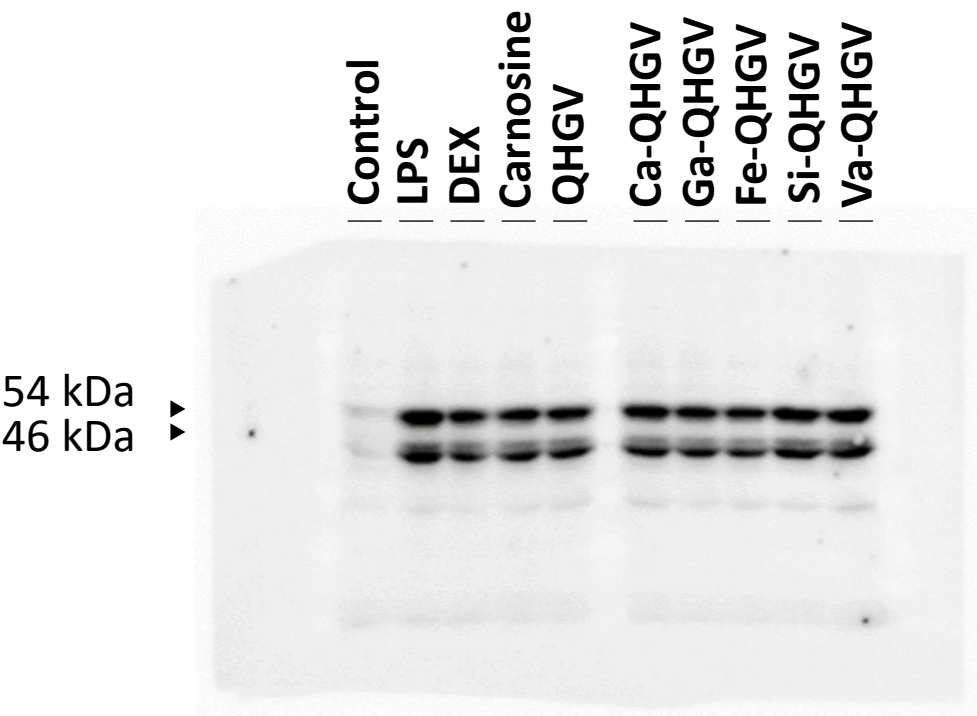

Figure 6(a)  
ERK  
9107S,Cell signaling

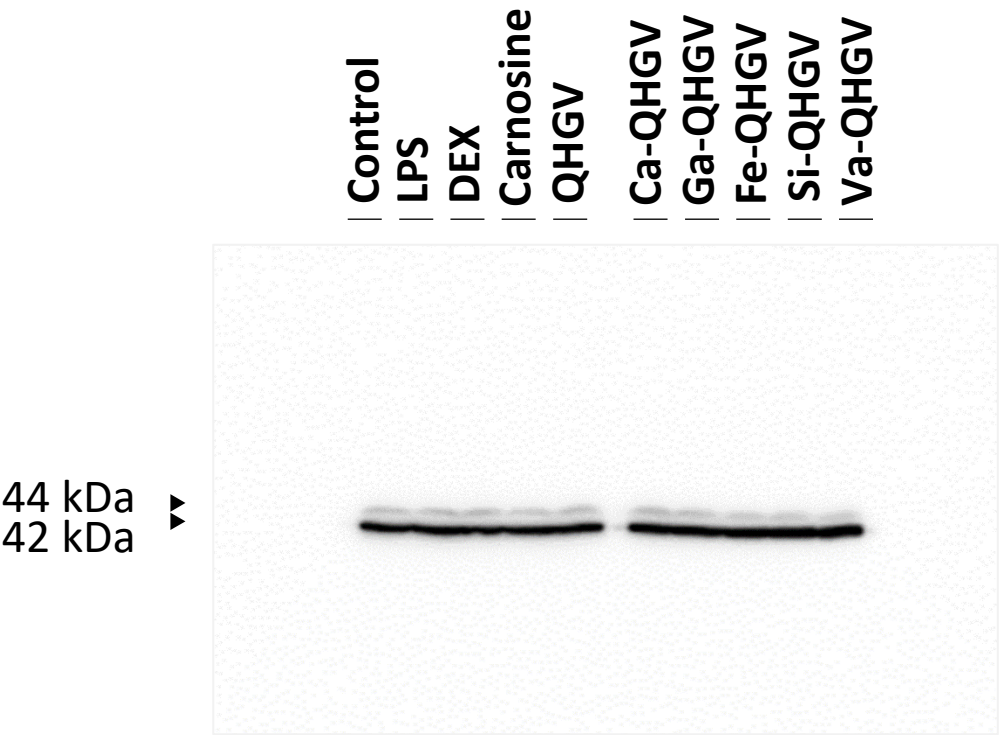

Figure 6(a)  
p-ERK  
9106S, Cell signaling

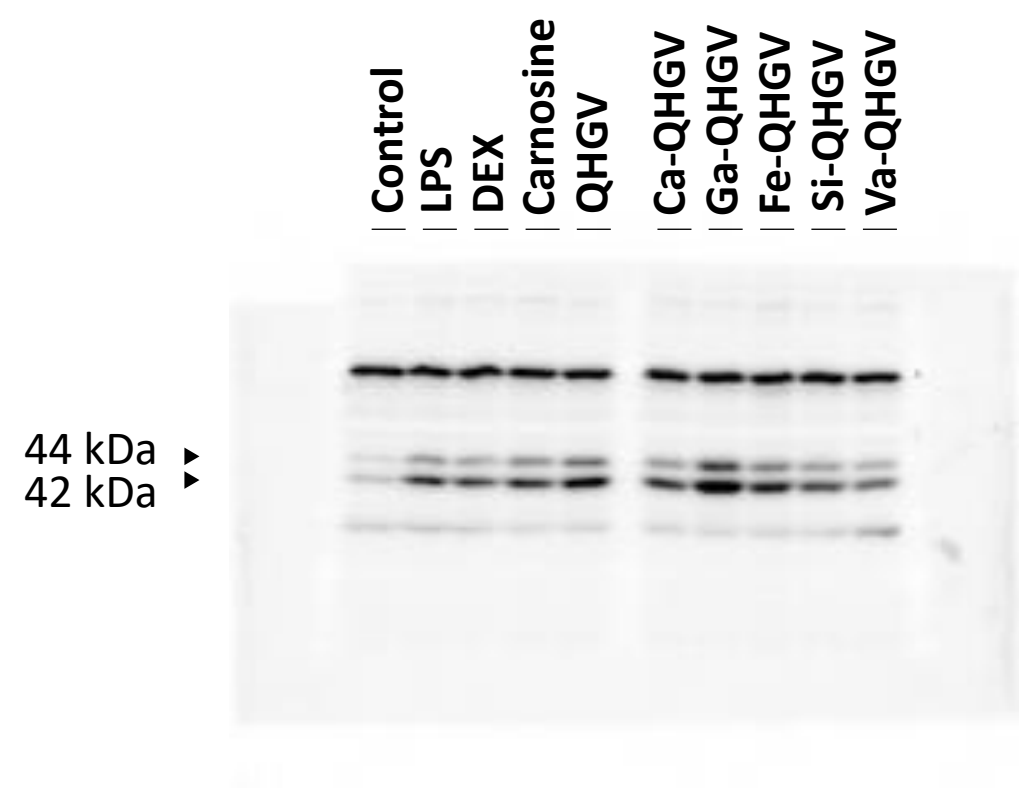

Figure 6(a)  
p38  
9217S, Cell signaling

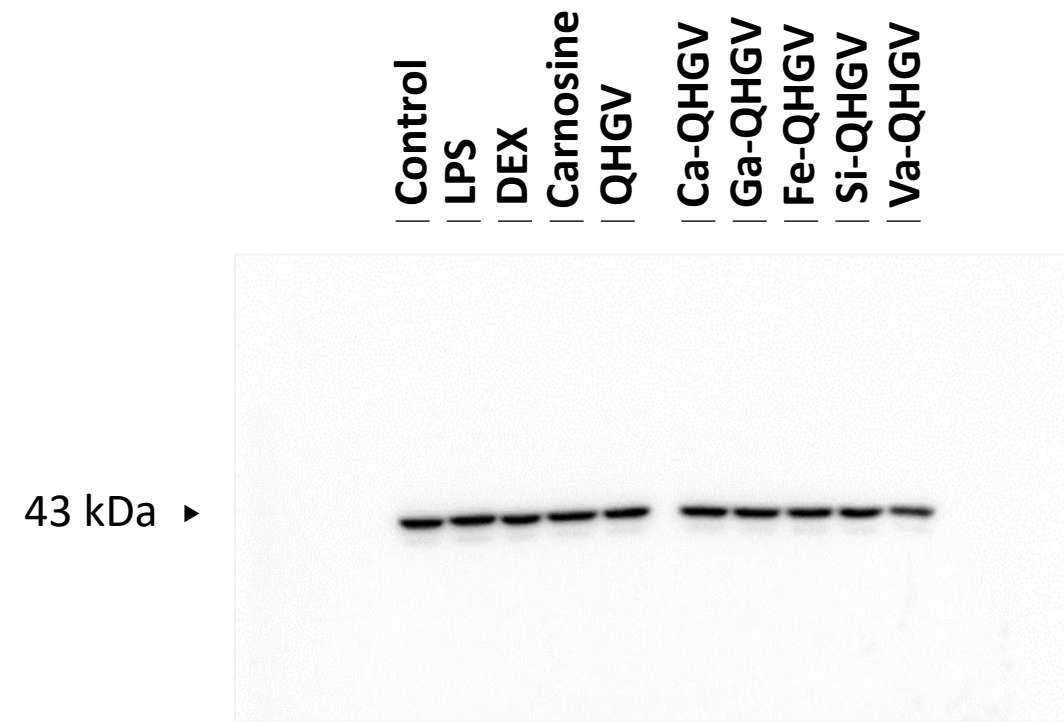

Figure 6(a)  
p-p38  
9216S, Cell signaling

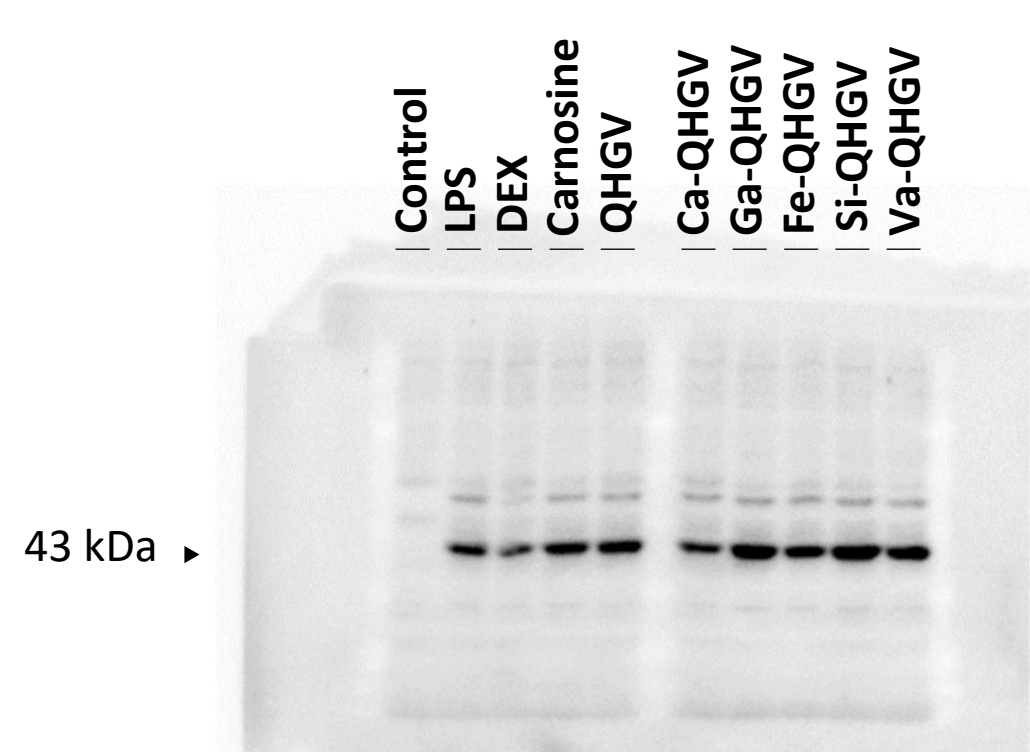

Figure 6(a)  
β-actin  
sc-47778, Santacruz

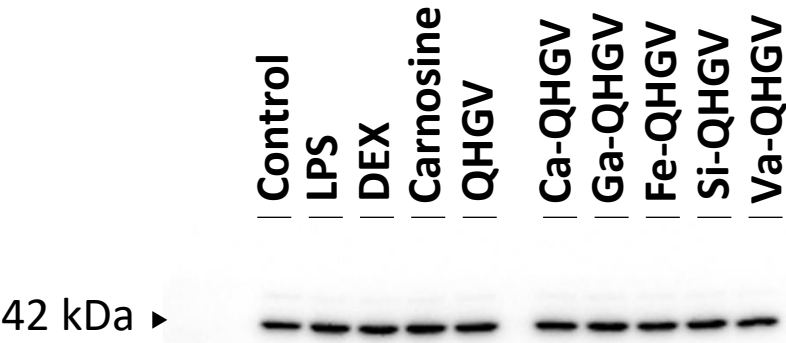

Figure 7(b)  
Collagen I  
66948S, Cell signaling

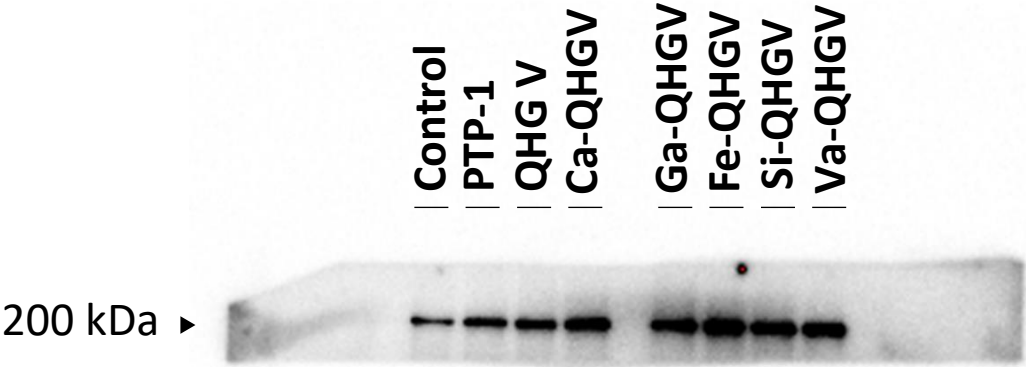

Figure 7(b)  
GAPDH  
sc-47724, Santacruz

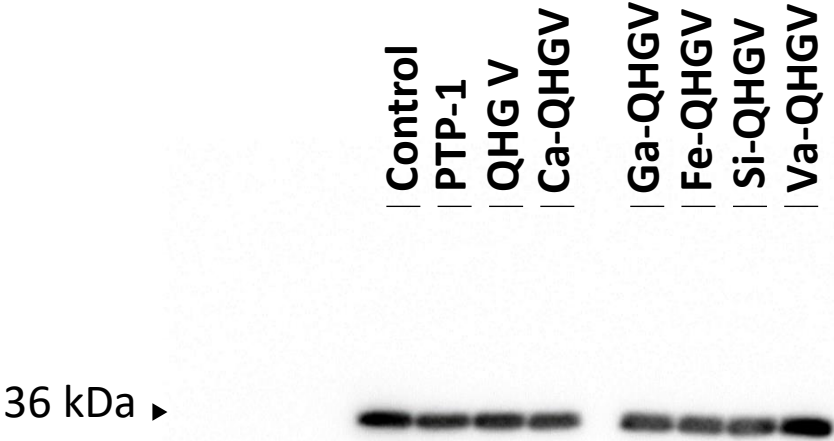

Supplement: s1 [file s1]
