# Supplementary material for: Synergistic Antioxidant and Anti-Inflammatory Effects of Phenolic Acid-Conjugated Glutamine–Histidine–Glycine–Valine (QHGV) Peptides Derived from Oysters (Crassostrea talienwhanensis)
Source: MDPI journal article supplement (doi:10.3390/antiox13040447), 2024-04-10
Supplement: s1 [file s1]

# Synergistic Anti-oxidant and Anti-inflammatory Effects of Phenolic Acid-Conjugated Oysters (*Crassostrea talienwhanensis*) derived QHGV Peptide

## Supplementary Materials:

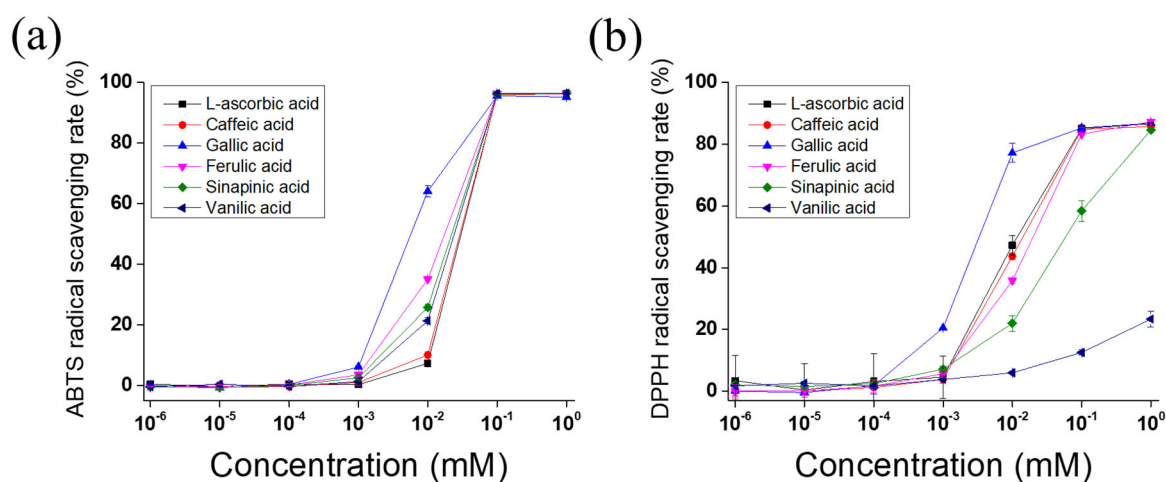

**Figure S1.** Antioxidants effect of phenolic acids. (a) ABTS radical scavenging activity and (b) DPPH radical scavenging activity was characterized at various concentrations.

**Table S1.** IC50 Values of peptide and ABTS radical scavenging activity rank. IC50 values was calculated by GraphPad Prism 5 software.

| Phenolic acid   | IC50 Values | Anti-oxidant Rank |
|-----------------|-------------|-------------------|
| Gallic acid     | 0.00249     | 1                 |
| Ga-QHGV         | 0.00458     | 2                 |
| Glutathione     | 0.0147      | 3                 |
| Va-QHGV         | 0.0164      | 4                 |
| Ca-QHGV         | 0.0167      | 5                 |
| Fe-QHGV         | 0.0178      | 6                 |
| L-ascorbic acid | 0.0238      | 7                 |
| QHGV            | -           | 8                 |

ABTS radical scavenging rate of 0.01 mM concentration

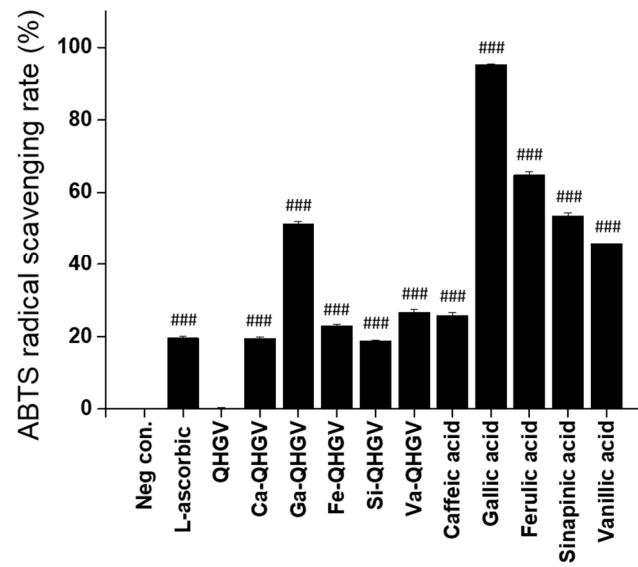

**Figure S2.** Antioxidant effect of phenolic acid (PA) and PA-QHGVs peptide. ABTS radical scavenging activity was characterized at a concentration of 0.01 mM.  $^{###}p < 0.001$  compared to the untreated group (one-way ANOVA;  $n = 3$ ).

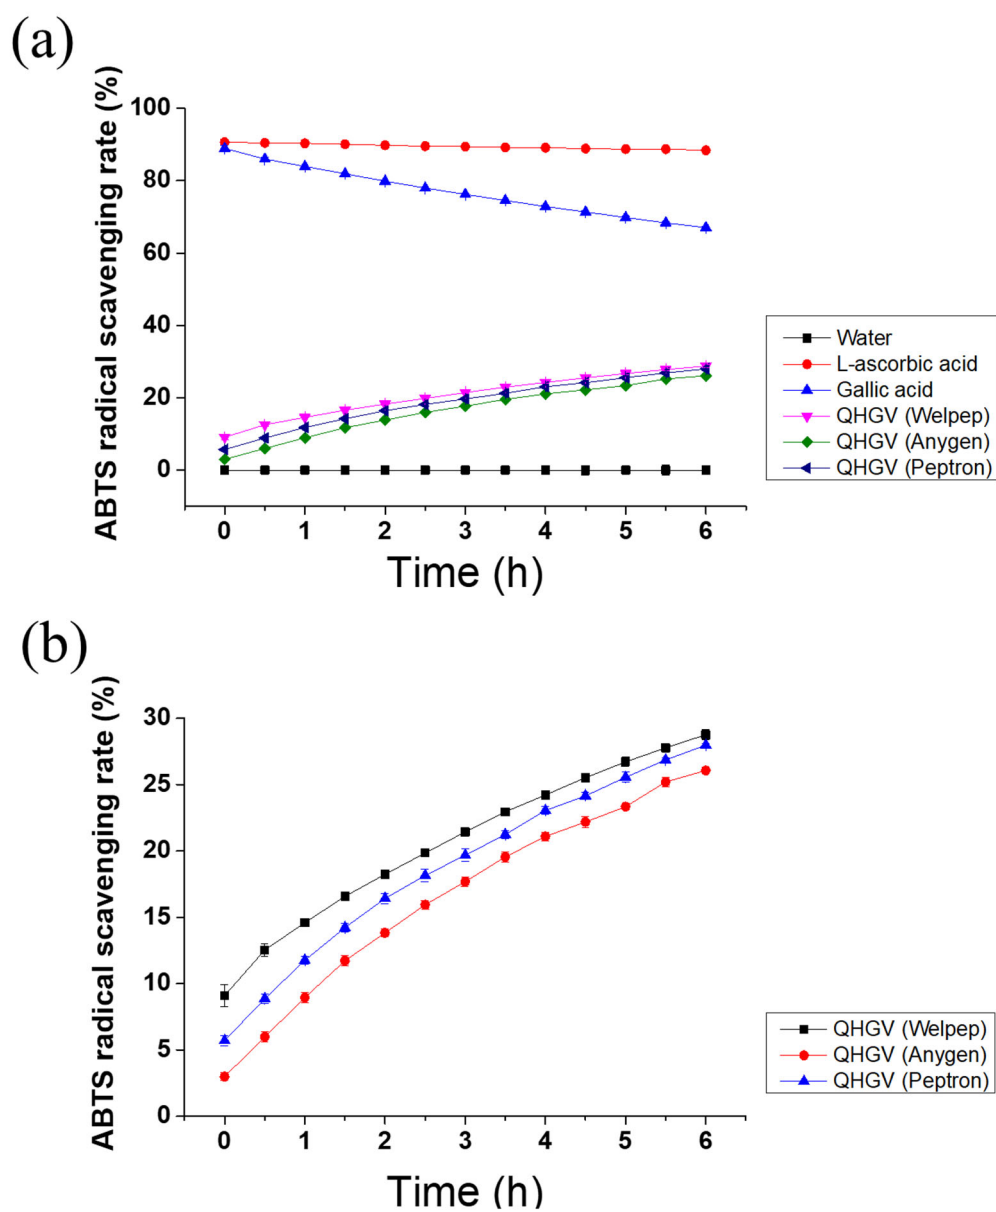

**Figure S3.** (a) Anti-oxidant effect of three different QHGV peptides from three different peptide companies. (b) The ABTS radical scavenging rate of QHGV peptides were low and slowly increased.

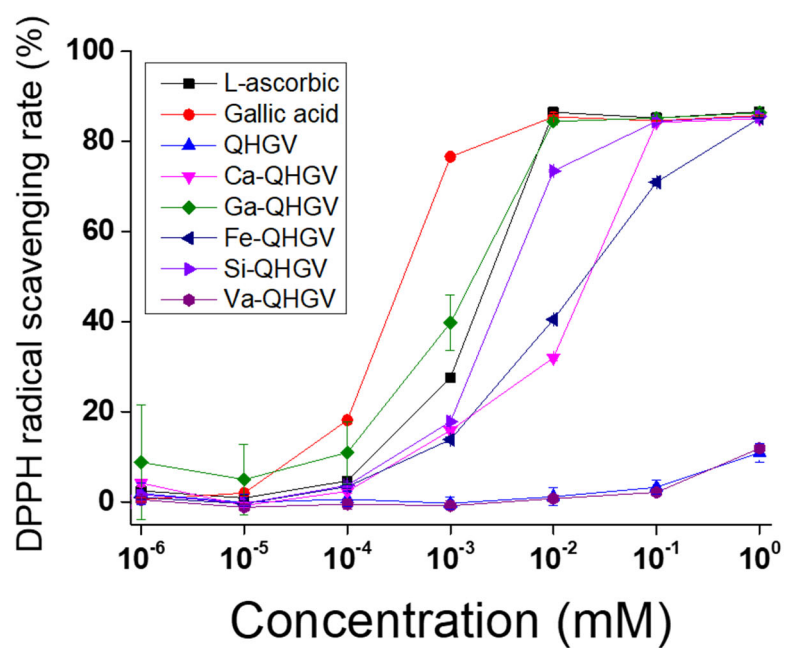

**Figure S4.** Antioxidant effect of peptide. DPPH radical scavenging activity at various concentrations. Excluding Va-QHGV, PA-QHGVs effectively scavenged DPPH radicals.

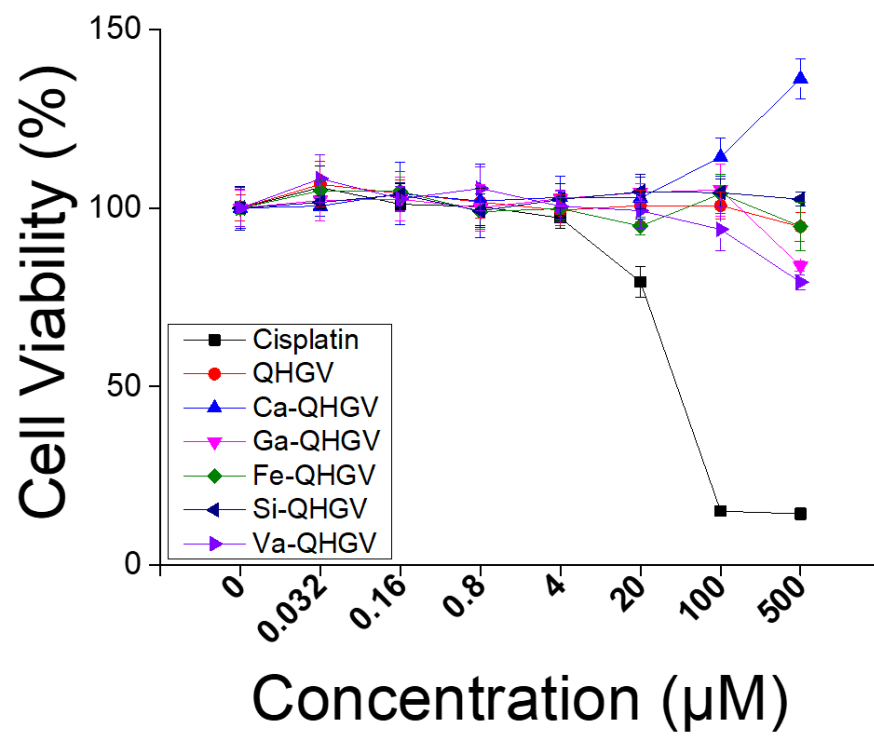

**Figure S5.** Cytotoxicity of Ca-, Ga-, Fe, Si-, and Va-QHGV at concentrations ranging from 0 to 500 μM in HaCaT cells.
